# Supplementary material
Source: HighWire-hosted journal article supplement (https://openres.ersjournals.com/highwire/filestream/11499/field_highwire_adjunct_files/5/ERJOR-00029-2016_supplementary_table_S3.pdf)
Supplement: ERJOR-00029-2016_supplementary_table_S3.pdf [file ERJOR-00029-2016_supplementary_table_S3.pdf]

## Supplemental Tables

### SUPPLEMENTAL TABLE 1: 234 genes, found to be differentially expressed with at least fold change of 2 in at least 1 of the mouse models.

FILE: Table\_S1\_234genes\_agilentMED-CENT\_LIMMA\_DE\_Union\_FC2-0\_withAllFC\_allvalues\_RAWedit

### SUPPLEMENTAL TABLE 2: Pathways and GO processes.

FILE: Table\_S2\_NetworkPathwayEnrichment\_GOanalyses

### SUPPLEMENTAL TABLE 3:

|          | GSE33561 | GSE33512 | GSE52509 | GSE17737 | GSE55127 | GSE18344 |
|----------|----------|----------|----------|----------|----------|----------|
| PLA2G7   | 1.59     | 1.52     | 1.56     | 2.1      | 1.87     | 2.73     |
| CYP1B1   | 3.18     | 13.07    | 3.28     | 3.07     | 7.95     | 6.66     |
| MMP12    | 3.44     | 3.16     | 8.83     | 18.37    | 13.45    | 26.29    |
| TREM2    | 1.92     | 1.77     | 3.45     | 2.22     | 4.02     | 2.05     |
| GDF15    | Yes      | 2.6      | 3.48     | 2.57     | 2.28     | 2.29     |
| NQO1     | Yes      | 4.03     | Yes      | 1.88     | 3.78     | 7.44     |
| AHRR     | Yes      | 8.95     | Yes      | 2.63     | 5.48     | 3.36     |
| ATP6V0D2 | Yes      | 1.82     | Yes      | 3.45     | 2.72     | 3.48     |
| ALDH3A1  | Yes      | 3.38     | Yes      | Yes      | 4.14     | 6.3      |
| ACP5     | Yes      | Yes      | Yes      | 2.7      | 2        | 2.19     |
| LCN2     | 3.39     | Yes      | 3.18     | 5.01     | 4.38     | 6.22     |
| CLEC5A   | Yes      | Yes      | 2.21     | 4.05     | 3.35     | 4.01     |
| SPP1     |          |          | 3.17     | 2.57     | 4.25     | 2.71     |
| NEK6     | Yes      | Yes      | 1.36     | 1.74     | 1.63     | 1.69     |
| GSTA2    |          | Yes      |          |          | 1.66     | 1.95     |

### SUPPLEMENTAL TABLE 3: Leading edge genes belonging to the gene set regulated by cigarette smoke in both mice and humans.

Genes belonging to the leading edge but not found to be differentially expressed in pair-wise comparisons are marked with "Yes"

Genes belonging to the leading edge and found to be differentially expressed in pair-wise comparisons are marked in gray, with fold change written in white. The gray scale is correlating with the fold change value (from light gray to black). Genes not belonging to the leading edge are marked in white. There were no genes that were differentially expressed but did not belong to the leading edge.

### SUPPLEMENTAL TABLE 4: Full name and function of differentially expressed genes shared between all smoke exposure systems.

FILE: Table\_S4\_GenesNamesFunctions
